# Supplementary material for: Leveraging functional annotation to identify genes associated with complex diseases
Source: PubMed Central journal article supplement (PMC7660930; doi:10.1371/journal.pcbi.1008315), 2020-11-02

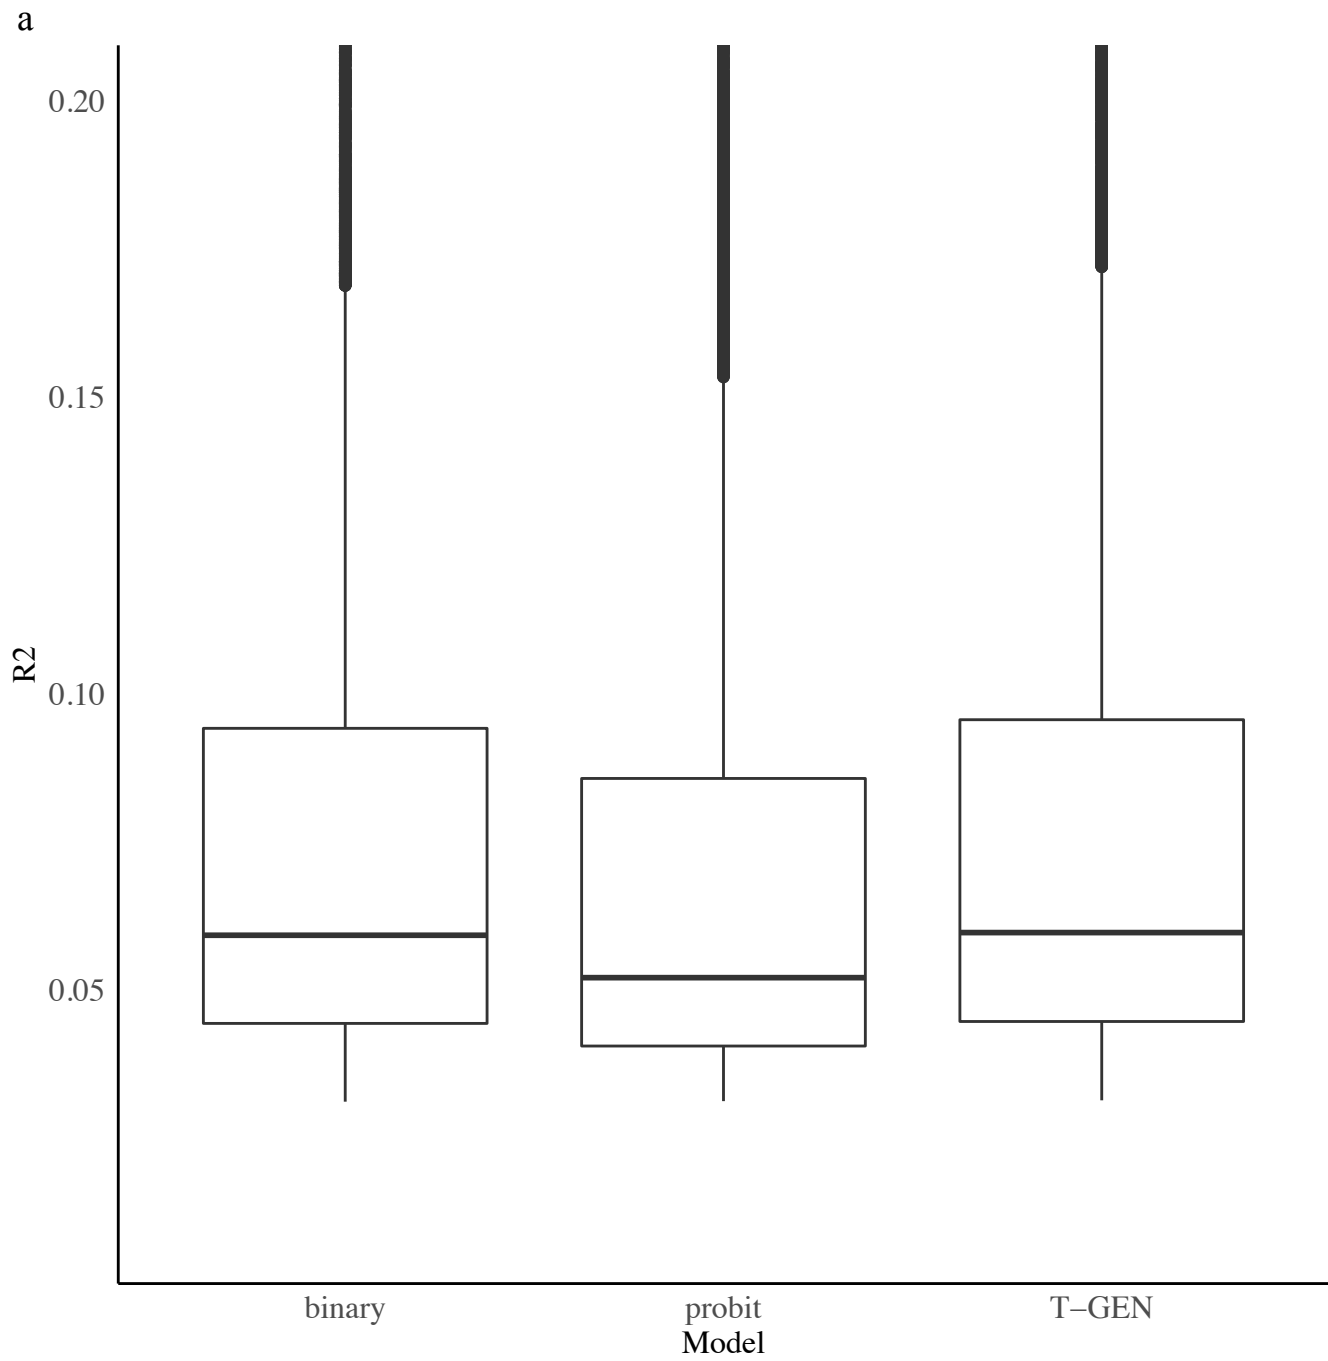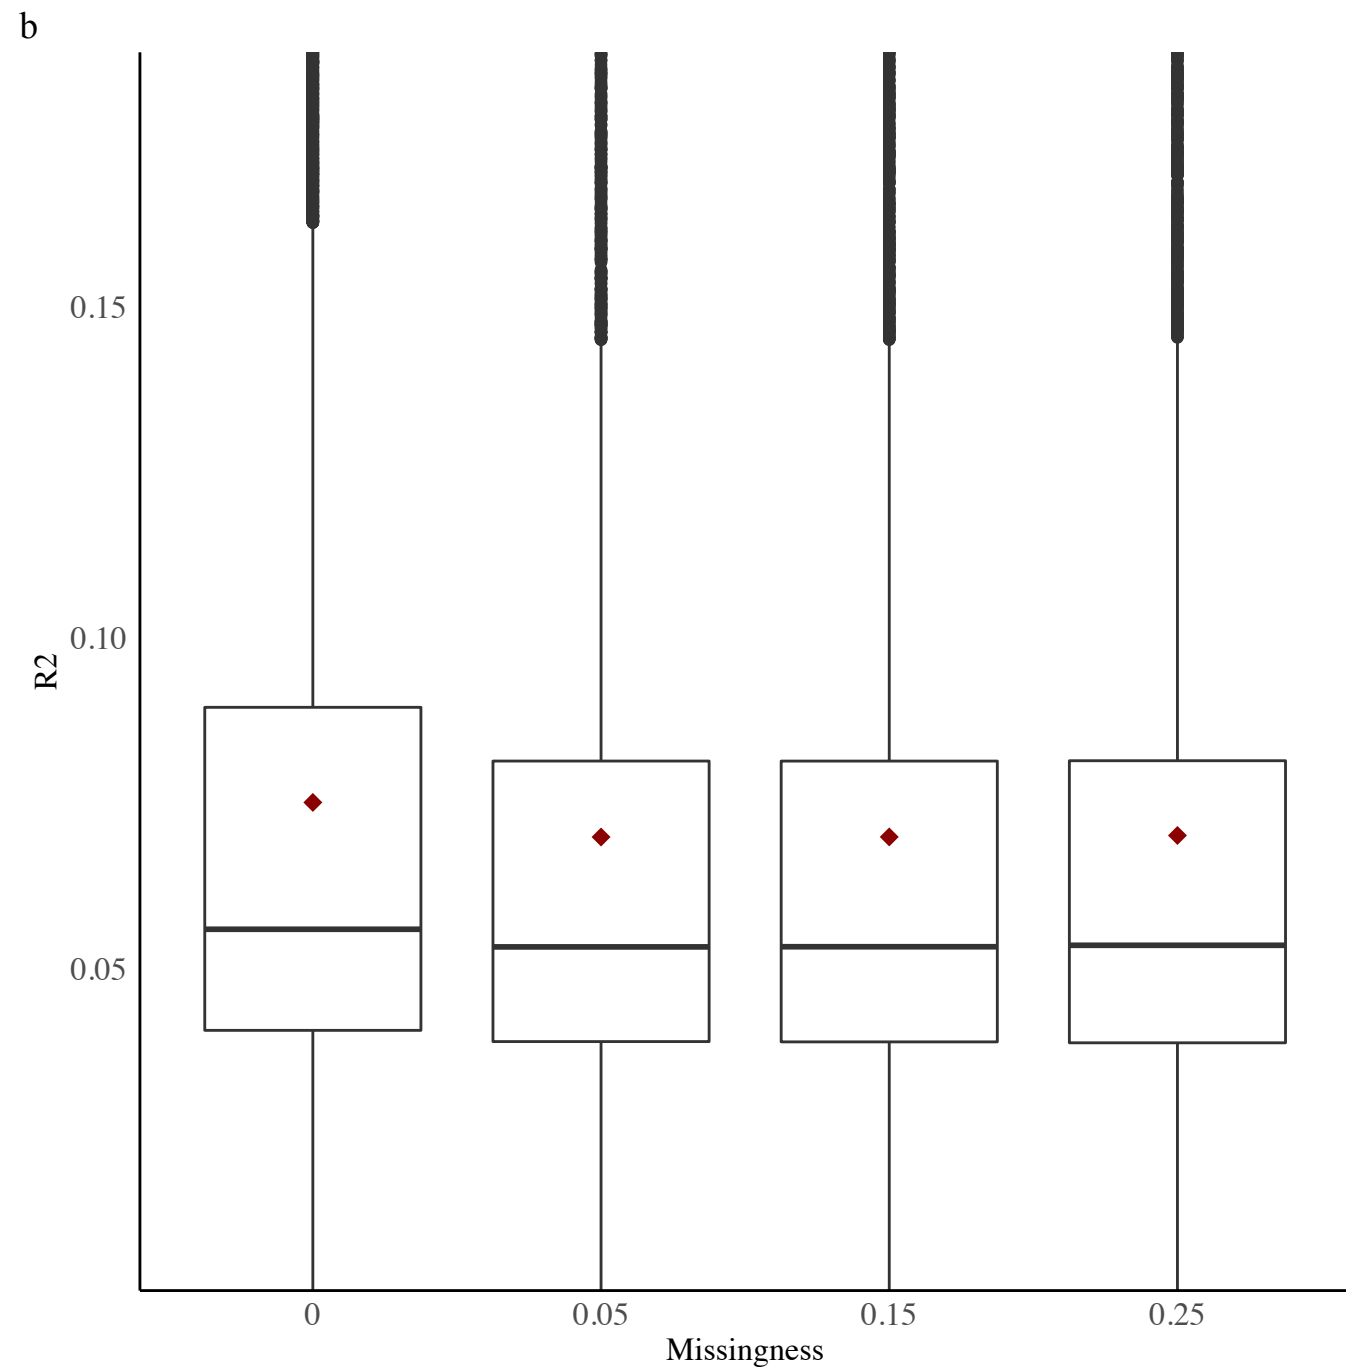

Supplement: pcbi.1008315.s009.pdf [file pcbi.1008315.s009.pdf]
